# Supplementary material for: Carrier-mediated ferromagnetism in two-dimensional PtS2
Source: Royal Society of Chemistry journal article supplement (doi:10.1039/c9ra09756b), 2020-01-01
Supplement: c9ra09756b1.pdf [file c9ra09756b1.pdf]

## Supplementary Information

# Carrier-mediated ferromagnetism in two-dimensional PtS<sub>2</sub>

Konstantina Iordanidou<sup>1</sup>, Michel Houssa<sup>2</sup>, Clas Persson<sup>1</sup>

<sup>1</sup>Centre for Materials Science and Nanotechnology, Department of Physics, University of

Oslo, P.O. Box 1048 Blindern, NO-0316 Oslo, Norway

<sup>2</sup>Department of Physics and Astronomy, University of Leuven, B-3001 Leuven, Belgium

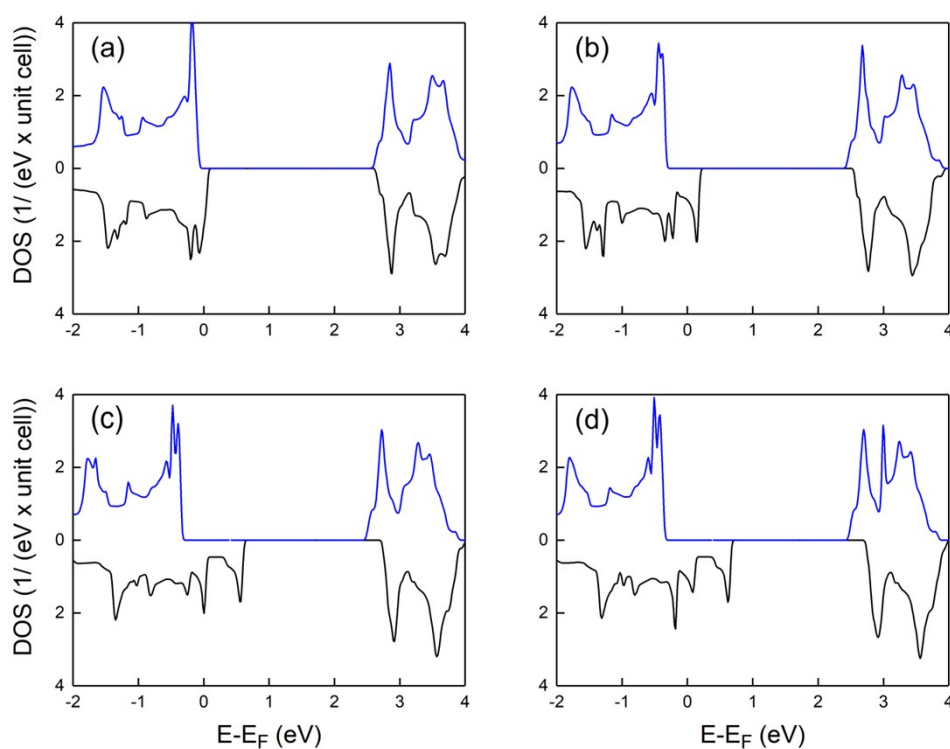

Figure S1: Density of states of charged unit cells for different hole densities: (a)  $0.6 \times 10^{14}/\text{cm}^2$ , (b)  $1.9 \times 10^{14}/\text{cm}^2$ , (c)  $3.8 \times 10^{14}/\text{cm}^2$ , and (d)  $4.4 \times 10^{14}/\text{cm}^2$ , using the HSE functional. The spectra include a 0.02 eV Lorentzian broadening. Blue and black lines indicate spin-up-like and spin-down-like density of states, respectively.
